# Supplementary material for: A perylenemonoimide-based fluorescent probe: ultrasensitive and selective tracing of endogenous peroxynitrite in living cells
Source: Royal Society of Chemistry journal article supplement (doi:10.1039/d3an01469j), 2023-01-01
Supplement: d3an01469j1.pdf [file d3an01469j1.pdf]

## Electronic Supporting Information (ESI)

### **Perylenemonoimide-based fluorescent probe: Ultrasensitive and selective tracing of endogenous peroxynitrite in living cells**

Aasif Khan,<sup>a</sup> Vinod Kumar Meena,<sup>a</sup> Akshay Silswal,<sup>a</sup> and Apurba Lal Koner<sup>\*a</sup>

*<sup>a</sup> Bionanotechnology Lab, Department of Chemistry, Indian Institute of Science Education and Research Bhopal (IISERB), Bhauri Bypass Road, Bhopal-462066, Madhya Pradesh, India*

*Email: akoner@iiserb.ac.in*

## Table of Content

| Sr. No.          | Caption                                                                              | Page No. |
|------------------|--------------------------------------------------------------------------------------|----------|
|                  | Experimental section                                                                 | 3-5      |
| <b>Scheme S1</b> | Synthetic route for synthesis of designed probe <b>PMI-BE</b> .                      | 6-7      |
| <b>Fig. S1</b>   | $^1\text{H}$ NMR spectrum of <b>PMI-BE</b> recorded in $\text{CDCl}_3$ at 500 MHz    | 8        |
| <b>Fig. S2</b>   | $^{13}\text{C}$ NMR spectrum of <b>PMI-BE</b> recorded in $\text{CDCl}_3$ at 400 MHz | 9        |
| <b>Fig. S3</b>   | APCI mass spectrum for compound <b>PMI-BE</b>                                        | 9        |
| <b>Fig. S4</b>   | Photophysical properties of <b>PMI-BE</b>                                            | 10       |
| <b>Table S1</b>  | Summary of photophysical properties of <b>PMI-BE</b>                                 | 10       |
| <b>Fig. S5</b>   | Response of <b>PMI-BE</b> towards $\text{ONOO}^-$ in ACN solvent                     | 11       |
| <b>Fig. S6</b>   | ESI HRMS for reaction product between <b>PMI-BE</b> and $\text{ONOO}^-$              | 11       |
| <b>Scheme S2</b> | Plausible mechanism of peroxynitrite detection                                       | 12       |
| <b>Fig. S7</b>   | MTT assay of <b>PMI-BE</b> in HeLa cell                                              | 12       |
| <b>Table S2</b>  | Comparison between reported $\text{ONOO}^-$ probes and <b>PMI-BE</b>                 | 13-14    |

## Experimental Section

### Materials and Methods:

All solvents and reagents were purchased from commercial sources and used as received. Potassium acetate (KOAc), 1-bromobutane, and Bis(pinacolato)diboron were purchased from Alfa Aesar, Potassium Carbonate ( $K_2CO_3$ ) was purchased from Otto, Bromine ( $Br_2$ ) was purchased from Merck, Glacial acetic acid was obtained from SDFCL. [1,1'-Bis(diphenylphosphino)ferrocene]dichloropalladium(II), Perylene-3,4,9,10-tetracarboxylic dianhydride, 2,6-diisopropylaniline, *tert*-butyl alcohol, *tetra*-butylammonium hydroxide, Zinc Acetate and *N,N'*-dimethyl-1,3-propanediamine were purchased from Sigma. Imidazole, dichloromethane (DCM), methanol (MeOH), *N,N*-dimethylformamide (DMF) and toluene were purchased from SRL. Potassium hydroxide (KOH) was taken from CDH, 1-butanol and *p*-toluene sulphonic acid were taken from Spectrochem. Iodoethane was obtained from TCI. The water used was of Milli-Q grade. Thin layer chromatography (TLC) analysis was carried out using Merck TLC Silica gel 60 F<sub>254</sub> and column chromatography was performed on silica gel (230-400 mesh size), purchased from Rankem.

### Sample preparation

The stock solutions of 1 mM concentration for spectroscopy experiments of dye were prepared in fresh distilled tetrahydrofuran (THF) solvent. The concentration of dyes was kept 2  $\mu$ M for all the measurements.

### Preparation of reactive oxygen species (ROS) and reactive nitrogen species (RNS)

Hydrogen peroxide ( $H_2O_2$ ), *tert*-butylhydroperoxide (TBHP), and sodium hypochlorite (NaOCl) were diluted from commercially available solutions.  $ROO\cdot$  was generated from 2,2'-azobis (2-amidinopropane) (AAPH). Superoxide ( $O_2^{\cdot-}$ ) was prepared from  $KO_2$  in DMSO. Peroxynitrite solution was generated by following the reported procedure.<sup>1</sup> The stock solution

were prepared in Milli-Q water and the concentration was determined using molar extinction co-efficient of  $1670 \text{ cm}^{-1}\text{M}^{-1}$  and absorbance at 302 nm obtained from UV- spectrophotometer.

### **Steady-state absorbance and fluorescence measurements**

All the steady-state absorption measurements were carried out using Shimadzu 1800 UV- spectrophotometer using a quartz cuvette with a 1 cm path length. To avoid the inner filter effect, all measurements were taken with a dilute solution of the sample. The HORIBA Jobin Yvon Fluorimeter was used for all steady-state fluorescence measurements. The excitation and emission slits on a 1 cm path length quartz cuvette were used to record fluorescence spectra, and the integration time was varied accordingly. All the experiments were performed at ambient temperature (298 K) unless otherwise mentioned.

### **Nuclear Magnetic Resonance and Mass Spectroscopy**

$^1\text{H}$  and  $^{13}\text{C}\{^1\text{H}\}$  NMR spectra were recorded on a Bruker spectrometer in  $\text{CDCl}_3$  as a solvent. The chemical shifts were reported in ppm scale with respect to the residual solvent signal at  $\delta = 7.26$  ppm in  $\text{CDCl}_3$  for  $^1\text{H}$  NMR at 500 MHz and 400 MHz. The mass spectra for all the compounds were recorded using APCI and ESI with the solution of dyes in chloroform solvent.

### **Calculation of limit of detection (LOD)**

The limit of detection was determined based on fluorescence titration. To get the slope, the decrease in fluorescence intensity at 578 nm was plotted with increasing concentration of  $\text{ONOO}^-$ . So, the detection limit (LOD) was calculated by using following equation

$$\text{LOD} = 3\sigma/k$$

Where,  $\sigma$  = Standard deviation of response

k = Slope of calibration curve

## Cell culture

Dulbecco's Modified Eagle Medium (DMEM), Trypsin, Antibiotic cocktail, and Fetal Bovine Serum (FBS) were purchased from HiMedia (USA). Lyso-Tracker Red, ER Tracker Red, and MitoTracker Red were purchased from Thermo Fisher Scientific (USA). The 35 mm glass bottom imaging dishes were obtained from Ibidi (Germany). All the confocal microscopy imaging was performed with an Olympus FV3000 Confocal Laser Scanning Microscope (LSM). HeLa cells and RAW 264.7 cells were obtained from NCCS, Pune, India, and were grown in a 25 cm<sup>2</sup> cell culture flask (Corning, USA) using DMEM containing 10% (v/v) FBS and 1% (v/v) antibiotic cocktail in 5% CO<sub>2</sub> at 37 °C in a CO<sub>2</sub> incubator. For imaging purposes, cells were grown to 75% - 80% confluency in the 35 mm glass bottom imaging dishes ( $170 \pm 5 \mu\text{m}$ ) in DMEM with 10% FBS. For the colocalization experiment, the cells were co-incubated with indicated concentrations of **PMI-BE** and commercially available trackers for 10 minutes and washed with PBS (pH 7.4) twice before imaging. For the generation of cellular endogenous peroxynitrite, RAW 264.7 cells were incubated with 1  $\mu\text{g/mL}$  lipopolysaccharide (LPS) and 50 ng/mL interferon- $\gamma$  (IFN- $\gamma$ ) for 10 h at 37 °C and then stained with 1  $\mu\text{M}$  **PMI-BE** for 10 min and imaged under the microscope.

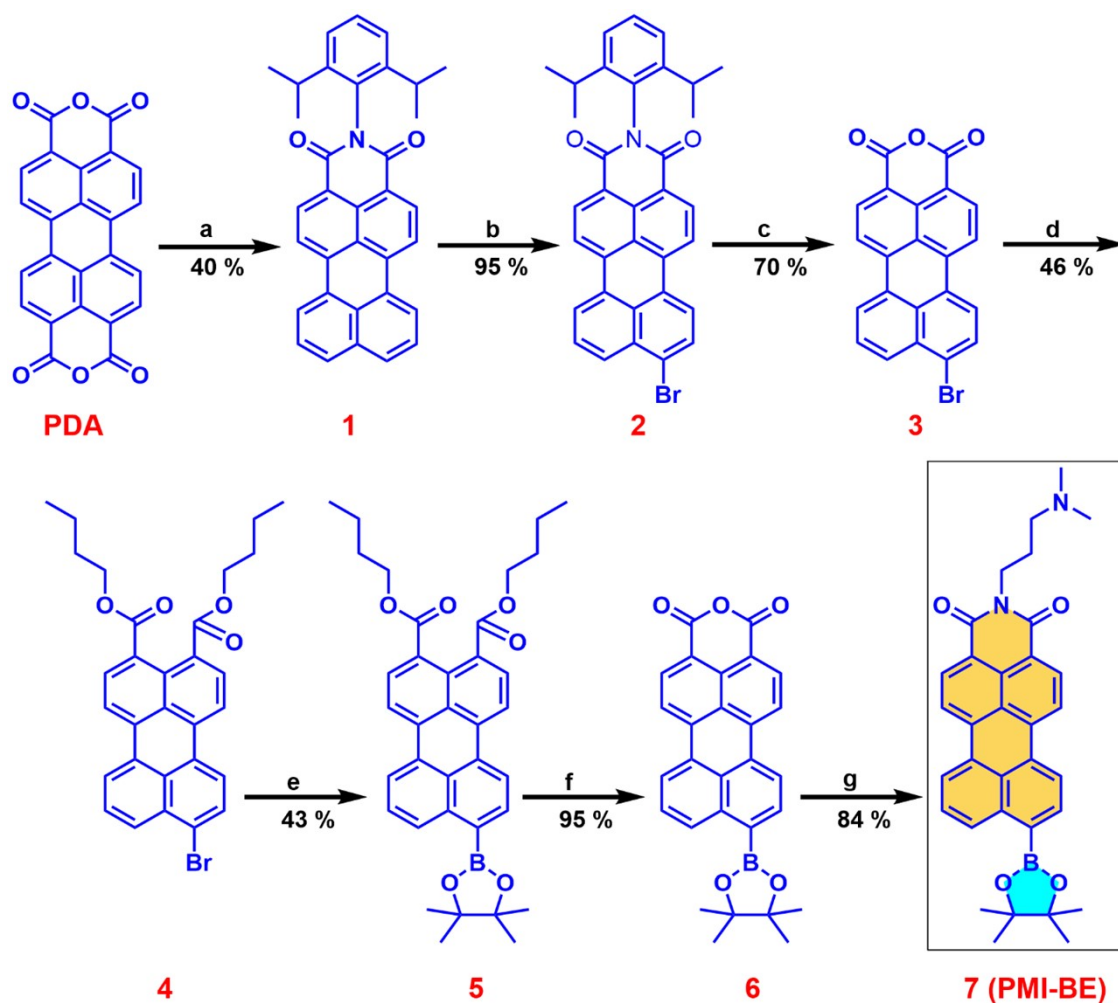

(a) 2,6-diisopropylaniline,  $\text{Zn}(\text{OAc})_2 \cdot 2\text{H}_2\text{O}$ , Imidazole,  $\text{H}_2\text{O}$  190 °C 18 h; (b)  $\text{Br}_2$ , DCM, reflux, 3 h; (c) KOH,  $t\text{BuOH}$ , 100 °C, 3 h; (d) 1-Butanol, 1-Bromobutane, *tetra*-butylammonium hydroxide,  $\text{K}_2\text{CO}_3$ , 120 °C, 3 h; (e) Bis(pinacolato)diboron, KOAc, [1,1'-Bis(diphenylphosphino)ferrocene]dichloropalladium(II), complex with dichloromethane, toluene, reflux, overnight; (f) *p*-Toluenesulfonic acid, toluene, 120 °C, 3 h; (g) *N,N'*-Dimethyl-1,3-propanediamine, DMF, 80 °C, 2.15 h

**Scheme S1:** Synthetic route for synthesis of the designed probe **PMI-BE**.

### Synthesis of compound 6:

Compound **5** (50 mg, 0.0864 mmol) was dissolved in toluene (2.5 mL) and then *p*-toluenesulfonic acid (49.3 mg, 0.2592 mmol) added to it. The reaction mixture was kept in an oil bath at 120 °C for 3 h. After completion of reaction time, reaction mixture was allowed to cool at room temperature and then toluene was evaporated using rotatory evaporator. The precipitation was done using methanol and filtered out as desired brown-colored solid product (38 mg) in 95 % yield.

**Synthesis of compound 7 (PMI-BE):**

First, compound **6** (30 mg, 0.0669 mmol) was dissolved in dry DMF solvent (2 mL) and then *N,N*-Dimethyl-1,3-propanediamine (25  $\mu$ L, 0.2007 mmol) added to it. The reaction mixture was kept in an oil bath at 80 °C for 2.15 h. After completion, reaction mixture was allowed to cool at room temperature and then water (4 mL) was added to get the precipitate. The obtained precipitate was filtered out and dried under high vacuum as desired dark red-colored solid product (30 mg) in 84 % yield.

**<sup>1</sup>H NMR (500 MHz, CDCl<sub>3</sub>):**  $\delta$  8.86 (d,  $J$  = 8.4 Hz, 1H), 8.55 (d,  $J$  = 8.0 Hz, 2H), 8.44 – 8.34 (m, 4H), 8.17 (d,  $J$  = 7.5 Hz, 1H), 7.65 (t,  $J$  = 8.0 Hz, 1H), 4.25 (t, 2H), 2.46 (t,  $J$  = 7.3 Hz, 2H), 2.27 (s, 6H), 1.99 – 1.90 (m,  $J$  = 14.8, 7.4 Hz, 2H), 1.47 (s, 12H).

**<sup>13</sup>C {<sup>1</sup>H} NMR (400 MHz, CDCl<sub>3</sub>):**  $\delta$  163.92, 137.95, 137.50, 136.99, 136.21, 131.71, 131.49, 131.40, 131.32, 130.89, 129.59, 128.86, 127.56, 127.20, 126.99, 126.55, 123.68, 123.55, 122.58, 121.06, 120.68, 120.51, 120.16, 120.09, 96.13, 84.24, 57.08, 44.98, 38.54, 25.68, 25.02.

HRMS (APCI): calculated  $m/z$  of  $[M+H]^+$  = 533.2612, obtained  $m/z$  = 533.2608

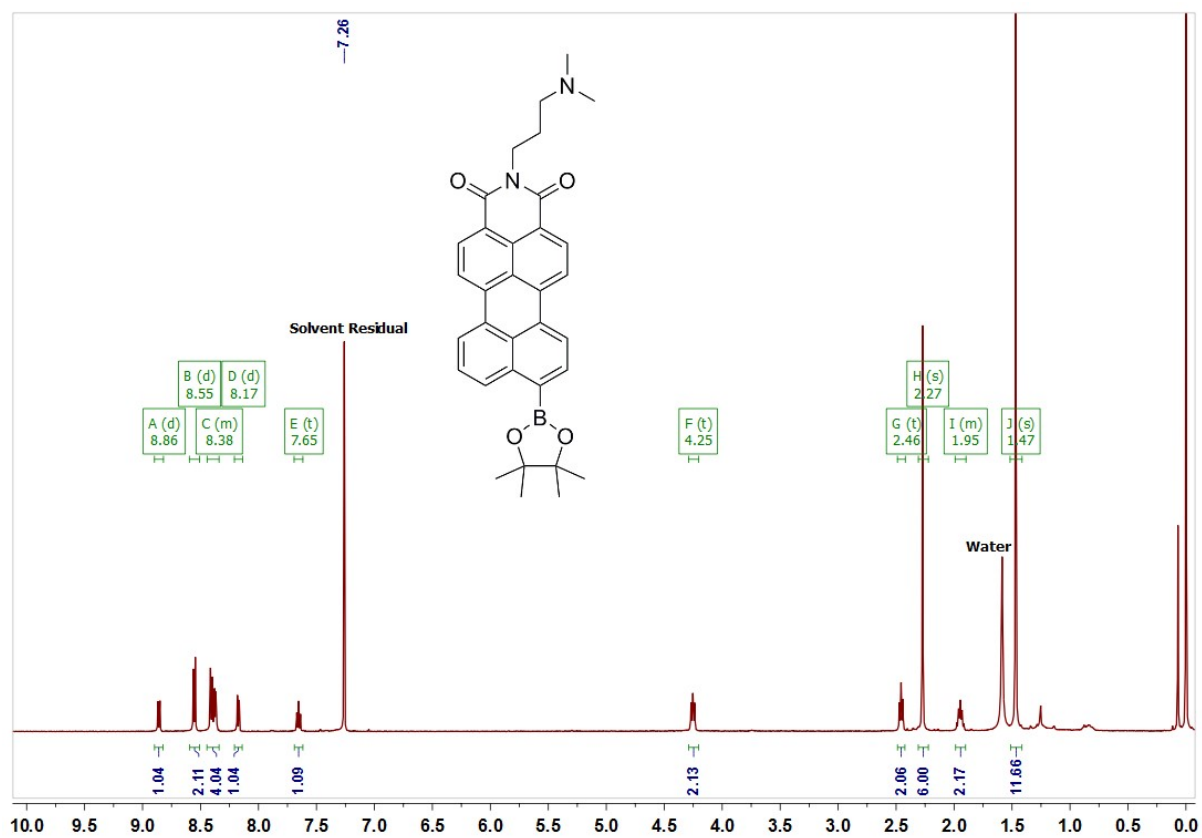

**Fig. S1:**  $^1\text{H}$  NMR spectrum of **7** (PMI-BE) recorded in  $\text{CDCl}_3$  at 500 MHz



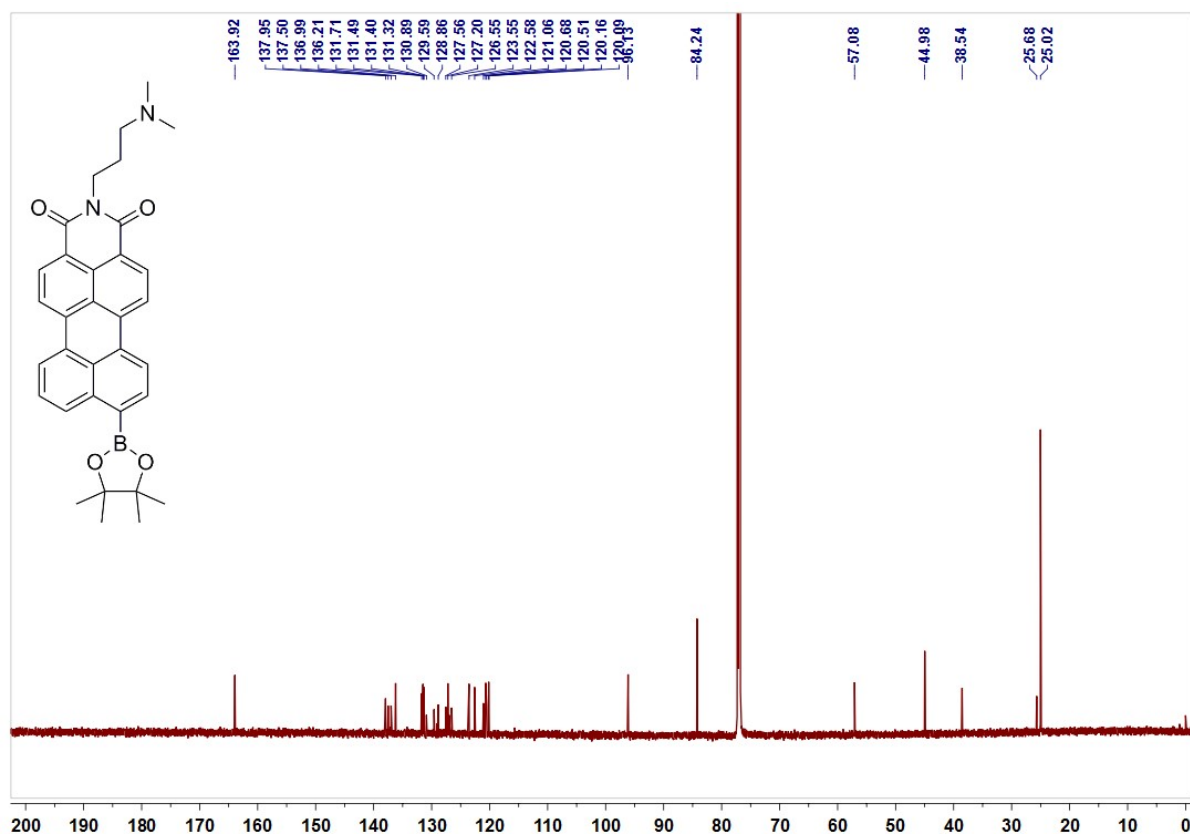

**Fig. S2:** <sup>13</sup>C NMR spectrum of **7 (PMI-BE)** recorded in CDCl<sub>3</sub> at 125 MHz

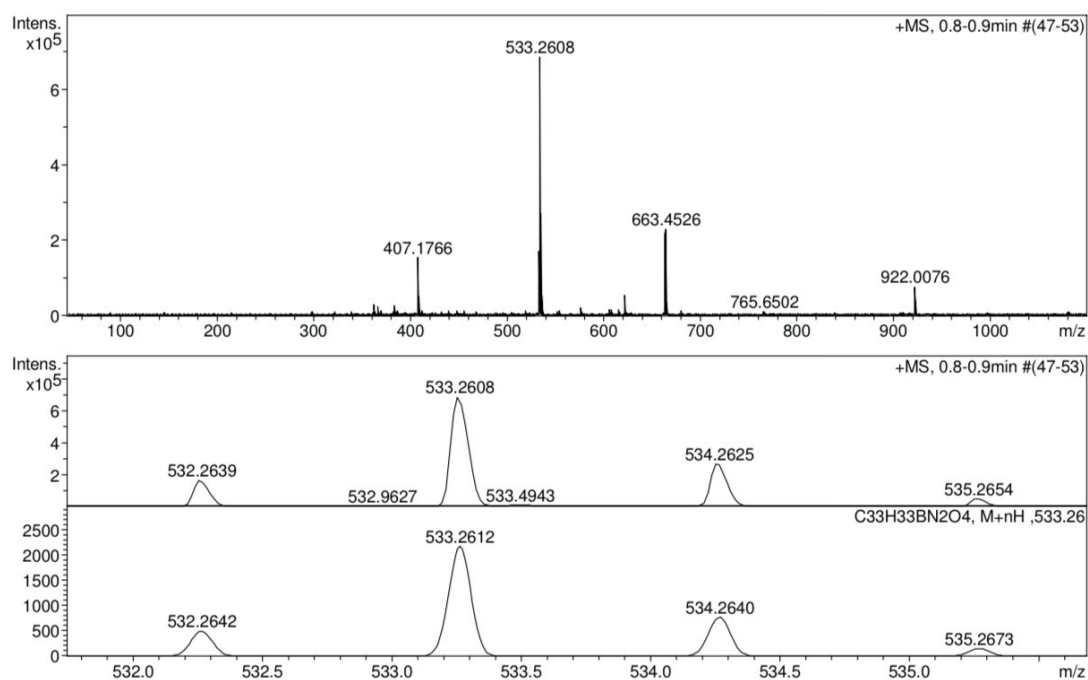

**Fig. S3:** APCI mass spectrum for compound **7 (PMI-BE)**, Calculated m/z of [M+H]<sup>+</sup> = 533.2612 and Obtained m/z = 533.2608

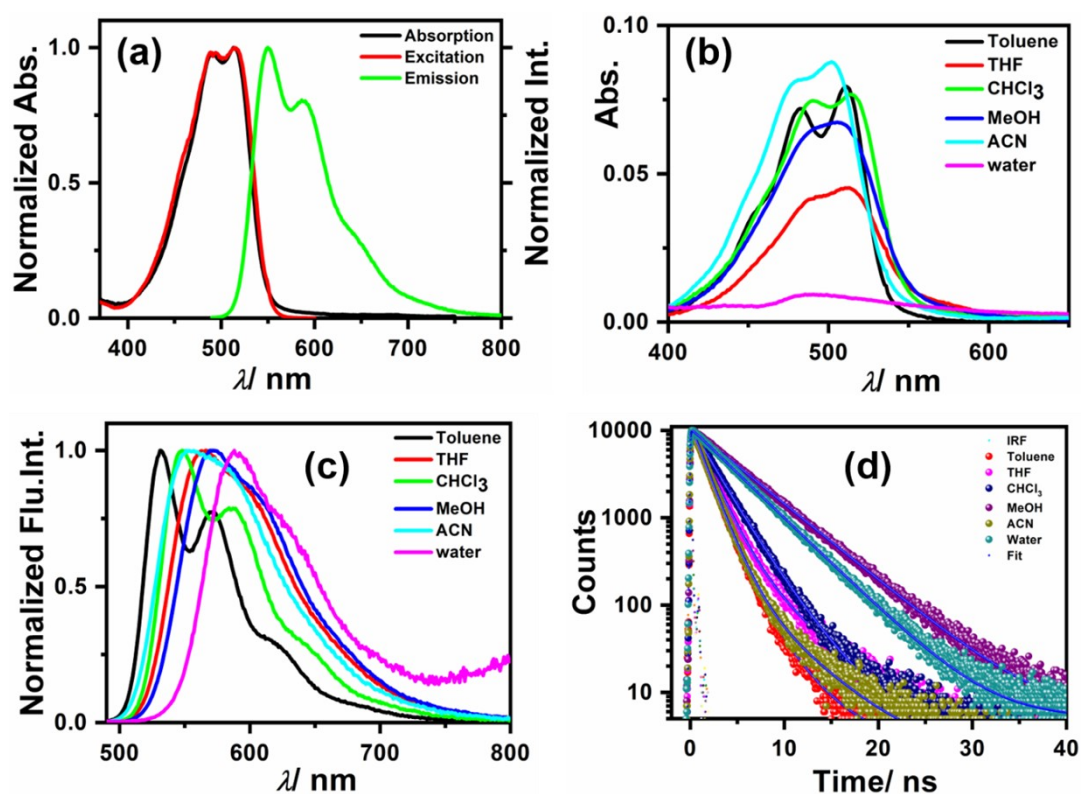

**Fig. S4:** (a) Optical absorption, emission, and excitation of **PMI-BE** (2 μM) in chloroform, solvent-dependent (b) UV-Vis. absorbance spectra (c) emission spectra, and (d) fluorescence lifetime decay.

**Table S1:** Summary of photophysical properties of **PMI-BE**

| Solvents          | $\lambda_{abs.}/\text{nm}$ | $\epsilon/\text{M}^{-1}\text{cm}^{-1}$ | $\lambda_{em.}/\text{nm}$ | Stokes Shift/ nm | $\tau_f/\text{ns}$ |
|-------------------|----------------------------|----------------------------------------|---------------------------|------------------|--------------------|
| Toluene           | 511                        | 39,720                                 | 531                       | 20               | 1.8                |
| THF               | 513                        | 22,630                                 | 565                       | 52               | 2.8                |
| CHCl <sub>3</sub> | 514                        | 38,390                                 | 549                       | 35               | 2.6                |
| MeOH              | 508                        | 33,575                                 | 572                       | 64               | 5.0                |
| ACN               | 502                        | 43,855                                 | 554                       | 52               | 2.2                |
| Water             | 490                        | 4,625                                  | 588                       | 98               | 4.2                |

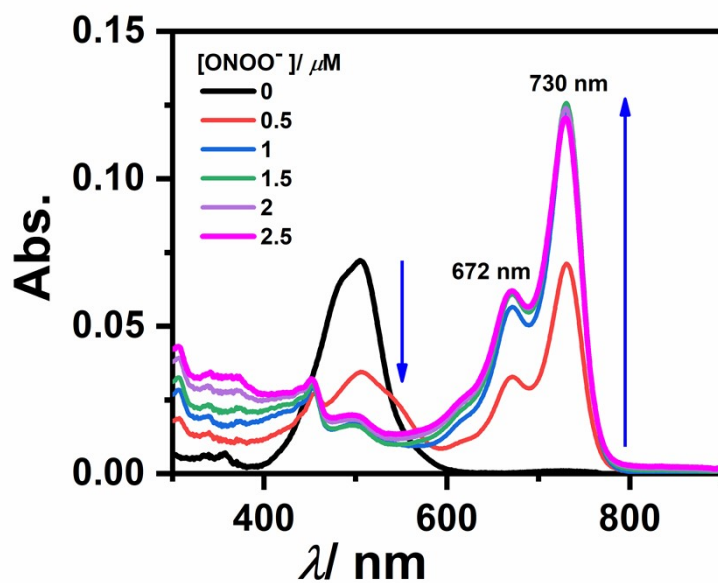

**Fig. S5:** Response of 2  $\mu\text{M}$  **PMI-BE** towards peroxynitrite in acetonitrile (ACN) solvent

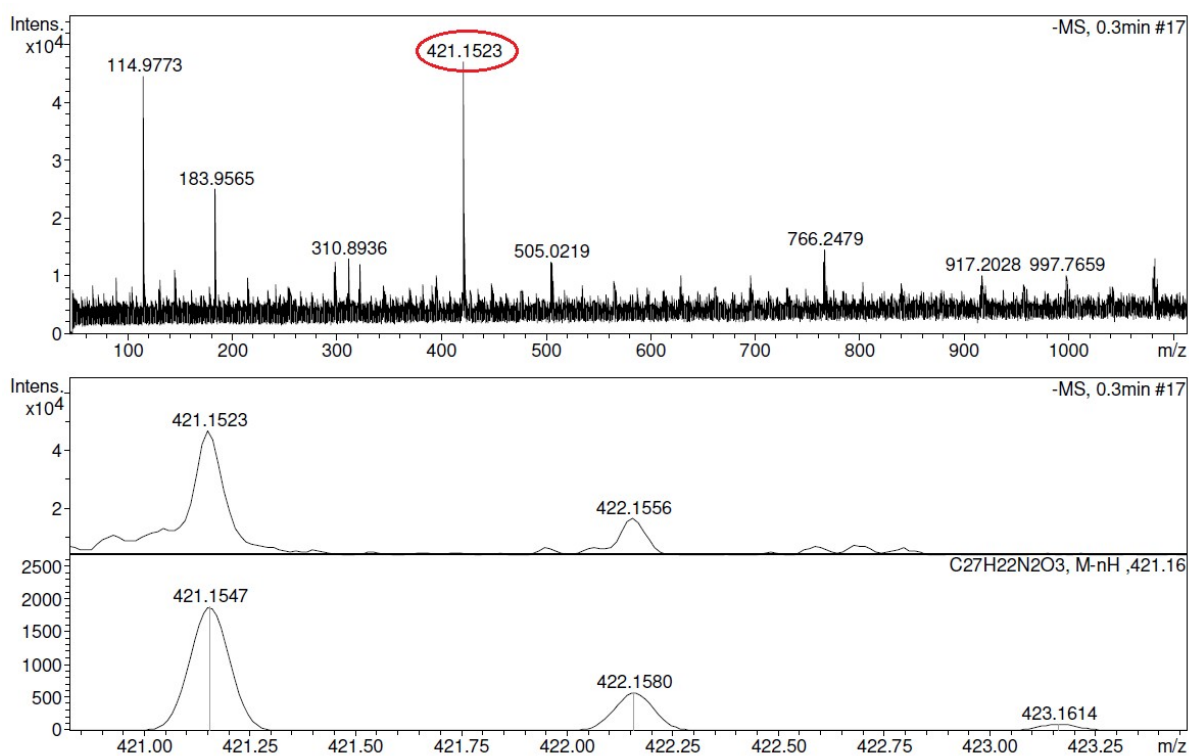

**Fig. S6:** ESI mass spectrum for reaction product between **PMI-BE** and  $\text{ONOO}^-$ . Calculated  $m/z$  of  $[\text{M-H}]^+ = 421.1547$  and Obtained  $m/z = 421.1523$

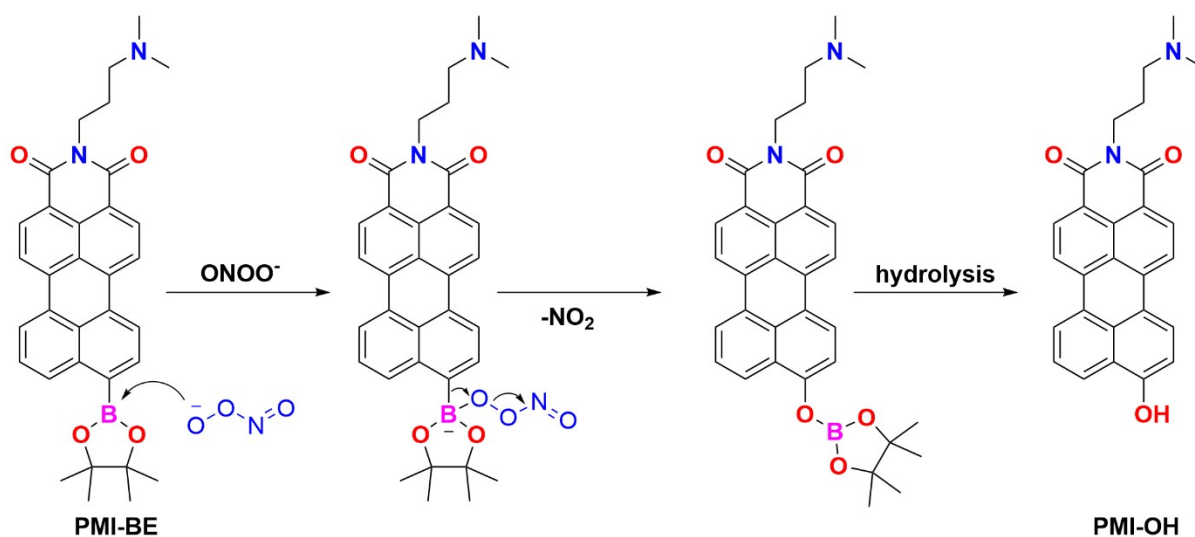

**Scheme S2:** Plausible mechanism of peroxynitrite detection

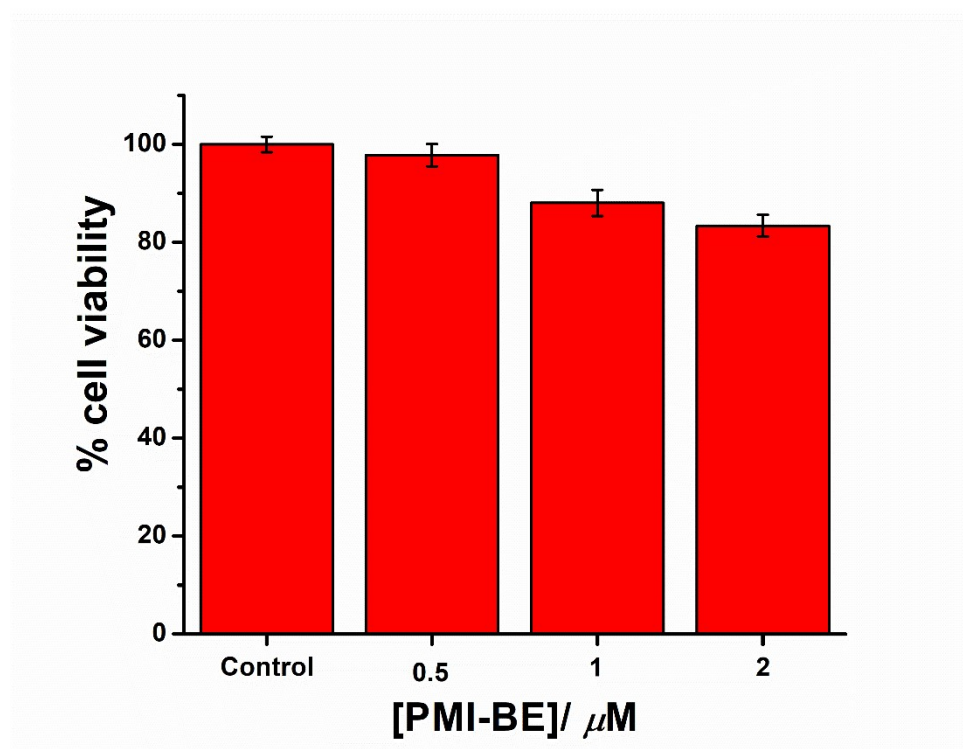

**Fig. S7:** MTT assay of **PMI-BE** in HeLa cell incubated with representative concentration for 24 h

**Table S2:** Table of comparison between reported ONOO<sup>-</sup> probes and **PMI-BE**

| Probe                                                                               | $\lambda_{em}$    | Detection limit | Imaging                            | References                                 |
|-------------------------------------------------------------------------------------|-------------------|-----------------|------------------------------------|--------------------------------------------|
| 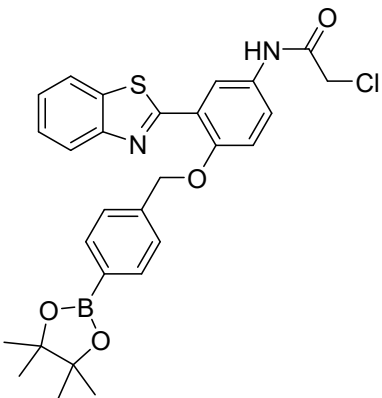   | 405/<br>481<br>nm | 21.4 nM         | Living cells                       | <i>Chem. Commun.</i> , 2018, 54, 9953-9956 |
|   | 548<br>nm         | 49.7 nM         | Living cells and <i>C. elegans</i> | <i>RSC Adv.</i> , 2020, 10, 38281-38286    |
|  | 500/<br>565<br>nm | 47 nM           | Living cells                       | <i>Anal. Methods</i> , 2019, 11, 5699-5703 |
|  | 450/<br>550<br>nm | 184 nM          | Living cells and tissues           | <i>Anal. Chem.</i> 2018, 90, 9347–9352     |

|                                                                                     |                                         |             |              |                                            |
|-------------------------------------------------------------------------------------|-----------------------------------------|-------------|--------------|--------------------------------------------|
| 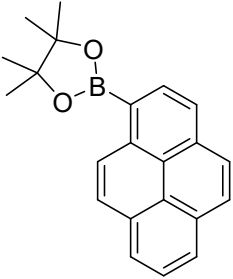   | 347 nm/<br>396 nm,<br>410 nm,<br>430 nm | 100 nM      | Living cells | <i>Analyst</i> , 2012, 137, 3740–3749      |
|    | 540 nm                                  | 2.5 $\mu$ M | Living cells | <i>Chem. Commun.</i> , 2014, 50, 9353-9356 |
|   | 480 nm/<br>580 nm                       | 35 nM       | Living cells | <i>RSC Adv.</i> , 2014, 4, 51589-51592     |
|  | 507/<br>743 nm<br>and<br>578 nm         | 0.26 nM     | Living cells | This work                                  |

## References:

1. J. W. Reed, H. H. Ho and W. L. Jolly, *J. Am. Chem. Soc.*, 1974, **96**, 1248-1249.
